# Supplementary material for: Active Alu retrotransposons in the human genome
Source: HighWire-hosted journal article supplement (doi:10.1101/gr.081737.108), 2008-10-03
Supplement: Supplemental__Figure_1.pdf [file Supplemental__Figure_1.pdf]

**Supplemental Figure 1.** Clustal alignment of 70 consensus and 45 active element sequences. The 70 consensus sequences and 45 active sequences were aligned and used to identify 124 positions that were conserved among these elements.

CLUSTAL X (1.83) multiple sequence alignment, manually curated.

```
AluYa1_1/1-281      GGCCGGGCGCGGTGGCTCACG-CCTGTAATCCCAGCACTTTGGGAGGCCG
10_Y_534/1-281     GGCCGGGCGCGGTGGCTCACG-CCTGTAATCCCAGCACTTTGGGAGGCCG
11_Y_h10.1/1-281   GGCCGGGCGCGGTGGCTCATG-CCTGTAATCCCAGCACTTTGGGAGGCCG
AluYd6/1-269       GGCCGGGCGCGGTGGCTCACG-CCTGTAATCCCAGCACTTTGGGAGGCCG
AluYd8/1-269       GGCCGGGCGCGGTGGCTCACG-CCTGTAATCCCAGCACTTTGGGAGGCCG
AluYc5/1-269       GGCCGGGCGCGGTGGCTCACG-CCTGTAATCCCAGCACTTTGGGAGGCCG
AluYb10/1-288      GGCCGGGCGCGGTGGCTCACG-CCTGTAATCCCAGCACTTTGGGAGGCCG
AluYb11/1-289      GGCCGGGCGCGGTGGCTCACG-CCTGTAATCCCAGCACTTTGGGAGGCCG
AluYb8/1-288       GGCCGGGCGCGGTGGCTCACG-CCTGTAATCCCAGCACTTTGGGAGGCCG
AluYb9/1-288       GGCCGGGCGCGGTGGCTCACG-CCTGTAATCCCAGCACTTTGGGAGGCCG
AluYb7_2/1-288     GGCCGGGCGCGGTGGCTCACG-CCTGTAATCCCAGCACTTTGGGAGGCCG
AluYb7_1/1-288     GGCCGGGCGCGGTGGCTCACG-CCTGTAATCCCAGCACTTTGGGAGGCCG
AluYb7_3/1-288     GGCCGGGCGCGGTGGCTCACG-CCTGTAATCCCAGCACTTTGGGAGGCCG
AluYb6_1/1-288     GGCCGGGCGCGGTGGCTCACG-CCTGTAATCCCAGCACTTTGGGAGGCCG
AluYb7_4/1-288     GGCCGGGCGCGGTGGCTCACG-CCTGTAATCCCAGCACTTTGGGAGGCCG
AluYb5/1-281       GGCCGGGCGCGGTGGCTCACG-CCTGTAATCCCAGCACTTTGGGAGGCCG
AluYb6_2/1-281     GGCCGGGCGCGGTGGCTCACG-CCTGTAATCCCAGCACTTTGGGAGGCCG
AluYb3a1/1-281     GGCCGGGCGCGGTGGCTCACG-CCTGTAATCCCAGCACTTTGGGAGGCCG
AluYb3a2/1-281     GGCCGGGCGCGGTGGCTCACG-CCTGTAATCCCAGCACTTTGGGAGGCCG
AluYbc3a/1-282     GGCCGGGCGCGGTGGCTCACG-CCTGTAATCCCAGCACTTTGGGAGGCCG
AluYi6/1-282       GGCCGGGCGCGGTGGCTCACG-CCTGTAATCCCAGCACTTTGGGAGGCCG
111_Yc1_h20.1/1-281 GGCCGGGCGCGGTGGCTCACG-CCTGTAATCCCAGCACTTTGGGAGGCCG
AluYg6a2/1-281     GGCCGGGCGCGGTGGCTCACG-CCTGTAATCCCAGCACTTTGGGAGGCCG
AluYg6/1-281       GGCCGGGCGCGGTGGCTCACG-CCTGTAATCCCAGCACTTTGGGAGGCCG
22_Yg6_397/1-280   GGCCGGGCGCGGTGGCTCACG-CCTGTAATCCCAGCACTTTGGGAGGCCG
28_Yc1_65/1-280    GGCCGGGCGCGGTGGCTCACG-CCTGTAATCCCAGCACTTTGGGAGGCCG
AluYg5b3/1-281     GGCCGGGCGCGGTGGCTCACG-CCTGTAATCCCAGCACTTTGGGAGGCCG
100_Y_h6.1/1-281   GGCCGGGCGCGGTGGCTCACG-CCTGTAATCCCAGCACTTTGGGAGGCCG
AluYj4/1-281       GGCCGGGCGCGGTGGCTCGCG-CCTGTAATCCCAGCACTTTGGGAGGCCG
50_Yj4_11/1-281    GGCCGGGCGCGGTGGCTCACG-CCTGTAATCCCAGCACTTTGGGAGGCCG
AluYj3/1-281       GGCCGGGCGCGGTGGCTCACG-CCTGTAATCCCAGCACTTTGGGAGGCCG
60_Y_h14/1-282     GGCCGGGCGCGGTGGCTCACG-CCTGTAATCCCAGCACTTTGGGAGGCCG
AluYh9/1-281       GGCCGGGCGCGGTGGCTCACG-CCTGTAATCCCAGCACTTTGGGAGGCCG
71_Yh9_20/1-282    GGCCGGGCGCGGTGGCTCACG-CCTGTAATCCCAGCACTTTGGGAGGCCG
AluYh7/1-281       GGCCGGGCGCGGTGGCTCACG-CCTGTAATCCCAGCACTTTGGGAGGCCG
AluYh3/1-281       GGCCGGGCGCGGTGGCTCACG-CCTGTAATCCCAGCACTTTGGGAGGCCG
AluYe5/1-280       GGCCGGGCGCGGTGGCTCACG-CCTGTAATCCCAGCACTTTGGGAGGCCG
128_Ye5_d196/1-279 GGCCGGGCGCGGTGGCTCACG-CCTGTAATCCCAGCACTTTGGGAGGCCG
AluYe6/1-280       GGCCGGGCGCGGTGGCTCACG-CCTGTAATCCCAGCACTTTGGGAGGCCG
AluYe4/1-282       GGCCGGGCGCGGTGGCTCACG-CCTGTAATCCCAGCACTTTGGGAGGCCG
AluYe2/1-279       GGCCGGGCGCGGTGGCTCACG-CCTGTAATCCCAGCACTTTGGGAGGCCG
102_Y_T144C/1-281  GGCCGGGCGCGGTGGCTCACG-CCTGTAATCCCAGCACTTTGGGAGGCCG
AluYf2/1-283       GGCCGGGCGCGGTGGCTCACG-CCTGTAATCCCAGCACTTTGGGAGGCCG
86_Yf2_38/1-283    AGCCGGGCGCGGTGGCTCACG-CCTGTAATCCCAGTATTTGGGAGGCCG
AluYf1/1-281       GGCCGGGCGCGGTGGCTCACG-CCTGTAATCCCAGCACTTTGGGAGGCCG
AluY/1-281         GGCCGGGCGCGGTGGCTCACG-CCTGTAATCCCAGCACTTTGGGAGGCCG
AluYc1/1-281       GGCCGGGCGCGGTGGCTCACG-CCTGTAATCCCAGCACTTTGGGAGGCCG
25_Yc1_73/1-279    GGCCGGGCGCGGTGGCTCACG-CCTGTAATCCCAGCACTTTGGGAGGCCG
AluYc2/1-281       GGCCGGGCGCGGTGGCTCACG-CCTGTAATCCCAGCACTTTGGGAGGCCG
27_Yc1_66/1-280    GGCCGG-CGCGGTGGCTCACG-CCTGTAATCCCAGCACTTTGGGAGGCCG
13_pAlu_A/1-286     GGCCGGGCGCGGTGGCTCACG-CCTGTAATCCCAGCACTTTGGGAGGCCG
AluYa1_2/1-281     GGCCGGGCGCGGTGGCTCACG-CCTGTAATCCCAGCACTTTGGGAGGCCG
AluYd3a1/1-270     GGCCGGGCGCGGTGGCTCACG-CCTGTAATCCCAGCACTTTGGGAGGCCG
AluYd3/1-269       GGCCGGGCGCGGTGGCTCACG-CCTGTAATCCCAGCACTTTGGGAGGCCG
AluYd2/1-269       GGCCGGGCGCGGTGGCTCACG-CCTGTAATCCCAGCACTTTGGGAGGCCG
AluYd/1-269        GGCCGGGCGCGGTGGCTCACG-CCTGTAATCCCAGCACTTTGGGAGGCCG
19_Ya5_173/1-281   GGCCGGGCGCGGTGGCTCACG-CCTGTAATCCCAGCACTTTGGGAGGCCG
125_Ya5_C138T/1-281 GGCCGGGCGCGGTGGCTCACG-CCTGTAATCCCAGCACTTTGGGAGGCCG
64_Ya5_G25C/1-281  GGCCGGGCGCGGTGGCTCACG-CCTGTAATCCCAGCACTTTGGGAGGCCG
92_Ya5#-Ya5#_95/1-278 GGCCGGGCGCGGTGGCTCACG-CCTGTAATCCCAGCACTTTGGGAGGCCG
117_Ya5_G159C/1-281 GGCCGGGCGCGGTGGCTCACG-CCTGTAATCCCAGCACTTTGGGAGGCCG
116_Ya5_G25C/1-281 GGCCGGGCGCGGTGGCTCACG-CCTGTAATCCCAGCACTTTGGGAGGCCG
119_Ya5_G25C/1-281 GGCCGGGCGCGGTGGCTCACG-CCTGTAATCCCAGCACTTTGGGAGGCCG
118_Ya5_G159C/1-281 GGCCGGGCGCGGTGGCTCACG-CCTGTAATCCCAGCACTTTGGGAGGCCG
```



|                       |                                                    |
|-----------------------|----------------------------------------------------|
| AluYa1_1/1-281        | AGGCGGGCGGATCAC--GAGGTCAGGAGATCGAGACCATCCTGGCTAACA |
| 10_Y_534/1-281        | AGGCGGGCGGATCAC--GAGGTCAGGAGATCGAGACCATCCTGGCTAACA |
| 11_Y_h10.1/1-281      | AGGTGGGCGGATCAC--GGGGTCAGGAGATCGAGACTATCCTGGCTAACT |
| AluYd6/1-269          | AGGCGGGCGGATCAC--GAGGTCAGGAGATCGAGACCA-----        |
| AluYd8/1-269          | AGGCGGGCGGATCAC--GAGGTCAGGAGATCGAGACCA-----        |
| AluYc5/1-269          | AGGCGGGCGGATCAC--GAGGTCAGGAGATCGAGACCA-----        |
| AluYb10/1-288         | AGGCGGGTGGATCAT--GAGGTCAGGAGATCGAGACCATCCTGGCTAACA |
| AluYb11/1-289         | AGGCGGGTGGATCAT--GAGGTCAGGAGATCGAGACCATCCTGGCTAACA |
| AluYb8/1-288          | AGGCGGGTGGATCAT--GAGGTCAGGAGATCGAGACCATCCTGGCTAACA |
| AluYb9/1-288          | AGGCGGGTGGATCAT--GAGGTCAGGAGATCGAGACCATCCTGGCTAACA |
| AluYb7_2/1-288        | AGGCGGGTGGATCAT--GAGGTCAGGAGATCGAGACCATCCTGGCTAACA |
| AluYb7_1/1-288        | AGGCGGGTGGATCAT--GAGGTCAGGAGATCGAGACCATCCTGGCTAACA |
| AluYb7_3/1-288        | AGGCGGGTGGATCAT--GAGGTCAGGAGATCGAGACCATCCTGGCTAACA |
| AluYb6_1/1-288        | AGGCGGGTGGATCAT--GAGGTCAGGAGATCGAGACCATCCTGGCTAACA |
| AluYb7_4/1-288        | AGGCGGGTGGATCAT--GAGGTCAGGAGATCGAGACCATCCTGGCTAACA |
| AluYb5/1-281          | AGGCGGGTGGATCAT--GAGGTCAGGAGATCGAGACCATCCTGGCTAACA |
| AluYb6_2/1-281        | AGGCGGGTGGATCAT--GAGGTCAGGAGATCGAGACCATCCTGGCTAACA |
| AluYb3a1/1-281        | AGGCGGGTGGATCAC--GAGGTCAGGAGATCGAGACCATCCTGGCTAACA |
| AluYb3a2/1-281        | AGGCGGGCGGATCAC--GAGGTCAGGAGATCGAGACCATCCTGGCTAACA |
| AluYbc3a/1-282        | AGGCGGGCGGATCAC--GAGGTCAGGAGATCGAGACCATCCTGGCTAACA |
| AluYi6/1-282          | AGGCGGGCGGATCAC--GAGGTCAGGAGATCGAGACCATCCTGGCTAACA |
| 111_Yc1_h20.1/1-281   | AGGCGGGCGGATCAC--AAGGTCAGGAGATCAAGACCATCCTGGCTAACA |
| AluYg6a2/1-281        | AGACGGGCGGATCAC--GAGGTCAGGAGATCGAGACCATCCTGGCTAACA |
| AluYg6/1-281          | AGACGGGCGGATCAC--GAGGTCAGGAGATCGAGACCATCCTGGCTAACA |
| 22_Yg6_397/1-280      | AGGCGGGCGGATCAC--GAGGTCAGGAGATCGAGACCATCCTGGCTAACA |
| 28_Yc1_65/1-280       | AGGCGGGCGGATCAC--GAGGTCAGGAGATCGAGACCATCCTGGCTAACA |
| AluYg5b3/1-281        | AGACGGGCGGATCAC--GAGGTCAGGAGATCGAGACCATCCTGGCTGACA |
| 100_Y_h6.1/1-281      | AGGCGGGCGGATCAC--GAGGTCAGGAGATCGAGACCATCCTGGCTAACA |
| AluYj4/1-281          | AGGCGGGCGGATCAC--GAGGTCAGGAGATCGAGACCATCCTGGCTAACA |
| 50_Yj4_11/1-281       | AGGCGGGCGGATCAC--GAGGTCAGGAGATCGAGACCATCCTGGCTAACA |
| AluYj3/1-281          | AGGCGGGCGGATCAC--GAGGTCAGGAGATCGAGACCATCCTGGCTAACA |
| 60_Y_h14/1-282        | AGGCAGGTGGATCAC--GAGGTCAGGAGATCGAGACCATCCTGGCTAACA |
| AluYh9/1-281          | AGGCGGGCGGATCAT--GAGGTCAGGAGATCGAGACCATCCTGGCTAACG |
| 71_Yh9_20/1-282       | AGGCGGGCGGATCAT--GAGGTCAGGAGATCGAGACCATCCTGGCTAACG |
| AluYh7/1-281          | AGGCGGGCGGATCAT--GAGGTCAGGAGATCGAGACCATCCTGGCTAACG |
| AluYh3/1-281          | AGGCGGGCGGATCAT--GAGGTCAGGAGATCGAGACCATCCTGGCTAACA |
| AluYe5/1-280          | AGGCGGGCGGATCAC--GAGGTCAGGAGATCGAGACCATCCTGGCTAACA |
| 128_Ye5_d196/1-279    | AGGCGGGCGGATCAC--GAGGTCAGGAGATCGAGACCATCCTGGCTAACA |
| AluYe6/1-280          | AGGCGGGCGGATCAC--GAGGTCAGGAGATCGAGACCATCCTGGCTAACA |
| AluYe4/1-282          | AGGCGGGCGGATCAC--GAGGTCAGGAGATCGAGACCATCCTGGCTAACA |
| AluYe2/1-279          | AGGCGGGCGGATCAC--GAGGTCAGGAGATCGAGACCATCCTGGCTAACA |
| 102_Y_T144C/1-281     | AGGCGGGCGGATCAC--GAGGTCAGGAGATCGAGACCATCCTGGCTAACA |
| AluYf2/1-283          | AGGCGGGCGGATCAC--GAGGTCAGGAGATCGAGACCATCCTGGCTAACA |
| 86_Yf2_38/1-283       | AGGCGGGCGGATCAC--GATGTCAGGAGATCGAGACCATCCTGGCTAACA |
| AluYf1/1-281          | AGGCGGGCGGATCAC--GAGGTCAGGAGATCGAGACCATCCTGGCTAACA |
| AluY/1-281            | AGGCGGGCGGATCAC--GAGGTCAGGAGATCGAGACCATCCTGGCTAACA |
| AluYc1/1-281          | AGGCGGGCGGATCAC--GAGGTCAGGAGATCGAGACCATCCTGGCTAACA |
| 25_Yc1_73/1-279       | AGGCGGGCGGATCAC--GAGGTCAGGAGATCGAGACCATCCTGGCTAACA |
| AluYc2/1-281          | AGGCGGGCGGATCAC--GAGGTCAGGAGATCGAGACCATCCTGGCTAACA |
| 27_Yc1_66/1-280       | AGGCGGGCGGATCAC--GAGGTCAGGAGATCGAGACCATCCTGGCTAACA |
| 13_pAlu_A/1-286       | AGGCGGGCGGATCAC--GAGGTCAGGAGATCGAGACCATCCTGGCTAACA |
| AluYa1_2/1-281        | AGGCGGGCGGATCAC--GAGGTCAGGAGATCGAGACCATCCTGGCTAACA |
| AluYd3a1/1-270        | AGGCGGGCGGATCAC--GAGGTCAGGAGATCGAGACCA-----        |
| AluYd3/1-269          | AGGCGGGCGGATCAC--GAGGTCAGGAGATCGAGACCA-----        |
| AluYd2/1-269          | AGGCGGGCGGATCAC--GAGGTCAGGAGATCGAGACCA-----        |
| AluYd/1-269           | AGGCGGGCGGATCAC--GAGGTCAGGAGATCGAGACCA-----        |
| 19_Ya5_173/1-281      | AGGCGGGCGGATCAC--GAGGTCAGGAGATCGAGACCATCCCCGCTAAAA |
| 125_Ya5_C138T/1-281   | AGGCGGGCGGATCAC--GAGGTCAGGAGATCGAGACCATCCCCGCTAAAA |
| 64_Ya5_G25C/1-281     | AGGCGGGCGGATCAC--GAGGTCAGGAGATCGAGACCATCCCCGCTAAAA |
| 92_Ya5#-Ya5#_95/1-278 | AGGCGGGCGGATCAC--GAGGTCAGGAGATCGAGACCATCCCCGCTAAAA |
| 117_Ya5_G159C/1-281   | AGGCGGGCGGATCAC--GAGGTCAGGAGATCGAGACCATCCCCGCTAAAA |
| 116_Ya5_G25C/1-281    | AGGCGGGCGGATCAC--GAGGTCAGGAGATCGAGACCATCCCCGCTAAAA |
| 119_Ya5_G25C/1-281    | AGGCGGGCGGATCAC--GAGGTCAGGAGATCGAGACCATCCCCGCTAAAA |
| 118_Ya5_G159C/1-281   | AGGCGGGCGGATCAC--GAGGTCAGGAGATCGAGACCATCCCCGCTAAAA |
| 120_Ya5_AC275TG/1-281 | AGGCGGGCGGATCAC--GAGGTCAGGAGATCGAGACCATCCCCGCTAAAA |
| AluYa5a1/1-281        | AGGCGGGCGGATCAC--GAGGTCAGGAGATCGAGGCCATCCCCGCTAAAA |
| AluYa5b1/1-281        | AGGCGGGCGGATCAC--GAGGTCAGGAGATCGAGACCATCCCCGCTAAAA |
| AluYa5a2/1-282        | AGGCGGGCGGATCAC--GAGGTCAGGAGATCGAGACCATCCCCGCTAAAA |
| 20_Ya5_054/1-285      | AGGCGGGCGGATCAC--GAGGTCAGGAGATCGAGACCATCCCCGCTAAAA |
| AluYa5/1-281          | AGGCGGGCGGATCAC--GAGGTCAGGAGATCGAGACCATCCCCGCTAAAA |
| AluYa8/1-280          | AGGCGGGCGGATCAC--GAGGTCAGGAGATCGAGACCATCCCCGCTAAAA |



AluYa1\_1/1-281 ---CGGTGAAACCCCGTCTCTACTAAAAA-----TACAAAAA----TTA  
 10\_Y\_534/1-281 ---CGGTGAAACCCCGTCTCTACTAAAAA-----TACAAAAA----TTA  
 11\_Y\_h10.1/1-281 ---CGGTGAAACCCCGTCTCTACTAAAAA-----TACAAAAA----TTA  
 AluYd6/1-269 ---CGGTGAAACCCCGTCTCTACTAAAAA-----TACAAAAA----TTA  
 AluYd8/1-269 ---CGGTGAAACCCCGTCTCTACTAAAAA-----TACAAAAA----TTA  
 AluYc5/1-269 ---CGGTGAAACCCCGTCTCTACTAAAAA-----TACAAAAA----TTA  
 AluYb10/1-288 ---AGGTGAAACCCCGTCTCTACTAAAAA-----TACAAAAA----TTA  
 AluYb11/1-289 ---AGGTGAAACCCCGTCTCTACTAAAAA-----TACAAAAA----TTA  
 AluYb8/1-288 ---AGGTGAAACCCCGTCTCTACTAAAAA-----TACAAAAA----TTA  
 AluYb9/1-288 ---AGGTGAAACCCCGTCTCTACTAAAAA-----TACAAAAA----TTA  
 AluYb7\_2/1-288 ---AGGTGAAACCCCGTCTCTACTAAAAA-----TACAAAAA----TTA  
 AluYb7\_1/1-288 ---AGGTGAAACCCCGTCTCTACTAAAAA-----TACAAAAA----TTA  
 AluYb7\_3/1-288 ---AGGTGAAACCCCGTCTCTACTAAAAA-----TACAAAAA----TTA  
 AluYb6\_1/1-288 ---AGGTGAAACCCCGTCTCTACTAAAAA-----TACAAAAA----TTA  
 AluYb7\_4/1-288 ---AGGTGAAACCCCGTCTCTACTAAAAA-----TACAAAAA----TTA  
 AluYb5/1-281 ---AGGTGAAACCCCGTCTCTACTAAAAA-----TACAAAAA----TTA  
 AluYb6\_2/1-281 ---AGGTGAAACCCCGTCTCTACTAAAAA-----TACAAAAA----TTA  
 AluYb3a1/1-281 ---CGGTGAAACCCCGTCTCTACTAAAAA-----TACAAAAA----TTA  
 AluYb3a2/1-281 ---CGGTGAAACCCCGTCTCTACTAAAAA-----TACAAAAA----TTA  
 AluYbc3a/1-282 ---CGGTGAAACCCCGTCTCTACTAAAAA-----TACAAAAA----TTA  
 AluYi6/1-282 ---CGGTGAAACCCCGTCTCTACTAAAAA-----TACAAAAA----TTA  
 111\_Yc1\_h20.1/1-281 ---CAGTGAAACCCCATCTCTACTAAAAA-----TACAAAAA----TTA  
 AluYg6a2/1-281 ---CGGTGAAACCCCGTCTCTACTAAAAA-----TACAAAAA----TTA  
 AluYg6/1-281 ---CGGTGAAACCCCGTCTCTACTAAAAA-----TACAAAAA----TTA  
 22\_Yg6\_397/1-280 ---CGGTGAAACCCCGTCTCTACTAAAAA-----TACAAAAA----TTA  
 28\_Yc1\_65/1-280 ---CGGTGAAACCCCGTCTCTACTAAAAA-----TACAAAAA----TTA  
 AluYg5b3/1-281 ---CGGTGAAACCCCGTCTCTACTAAAAA-----TACAAAAA----TTA  
 100\_Y\_h6.1/1-281 ---CGGTGAAACCCCATCTCTACTAAAAA-----TACAAAAA----TTA  
 AluYj4/1-281 ---CGGTGAAACCCCGTCTCTACTAAAAA-----TGCAAAAAA----TTA  
 50\_Yj4\_11/1-281 ---CGGTGAAACCCCGTCTCTACTAAAAA-----TGCAAAAAA----TTA  
 AluYj3/1-281 ---CGGTGAAACCCCGTCTCTACTAAAAA-----TGCAAAAAA----TTA  
 60\_Y\_h14/1-282 ---AGGCGAAACCCCTGTCTCTACTAAAAA-----TACAAAAA----TTA  
 AluYh9/1-281 ---CGGTGAAACCCCGCTCTACTAAAAA-----TACAAAAA----TTA  
 71\_Yh9\_20/1-282 ---CGGTGAAACCCCGCTCTACTAAAAA-----TACAAAAA----TTA  
 AluYh7/1-281 ---CGGTGAAACCCCGCTCTACTAAAAA-----TACAAAAA----TTA  
 AluYh3/1-281 ---CGGTGAAACCCCGCTCTACTAAAAA-----TACAAAAA----TTA  
 AluYe5/1-280 ---CGGTGAAACCCCGTCTCTACTAAAAA-----TACAAAAA----TTA  
 128\_Ye5\_d196/1-279 ---CGGTGAAACCCCGTCTCTACTAAAAA-----TACAAAAA----TTA  
 AluYe6/1-280 ---CGGTGAAACCCCGTCTCTACTAAAAA-----TACAAAAA----TTA  
 AluYe4/1-282 ---CGGTGAAACCCCGTCTCTACTAAAAA-----TACAAAAA----TTA  
 AluYe2/1-279 ---CGGTGAAACCCCGTCTCTACTAAAAA-----TACAAAAA----TTA  
 102\_Y\_T144C/1-281 ---CGGTGAAACCCCGTCTCTACTAAAAA-----TACAAAAA----TTA  
 AluYf2/1-283 ---CAGTGAAACCCCGTCTCTACTAAAAA-----CACAAAAAA----TTA  
 86\_Yf2\_38/1-283 ---CGGTGAAACCCCGTCTCTACTAAAAA-----CACAAAAAA----TTA  
 AluYf1/1-281 ---CGGTGAAACCCCGTCTCTACTAAAAA-----TACAAAAA----TTA  
 AluY/1-281 ---CGGTGAAACCCCGTCTCTACTAAAAA-----TACAAAAA----TTA  
 AluYc1/1-281 ---CGGTGAAACCCCGTCTCTACTAAAAA-----TACAAAAA----TTA  
 25\_Yc1\_73/1-279 ---CGGTGAAACCCCGTCTCTACTAAAAA-----TACAAAAA----TTA  
 AluYc2/1-281 ---AGGTGAAACCCCGTCTCTACTAAAAA-----TACAAAAA----TTA  
 27\_Yc1\_66/1-280 ---CGGTGAAACCCCGTCTCTACTAAAAA-----TACAAAAA----TTA  
 13\_pAlu\_A/1-286 ---CGGTGAAACCCCGTCTCTACTAAAAA-----TACAAAAA----TTA  
 AluYa1\_2/1-281 ---CGGTGAAACCCCGTCTCTACTAAAAA-----TACAAAAA----TTA  
 AluYd3a1/1-270 ---CGGTGAAACCCCGTCTCTACTAAAAA-----TACAAAAA----TTA  
 AluYd3/1-269 ---CGGTGAAACCCCGTCTCTACTAAAAA-----TACAAAAA----TTA  
 AluYd2/1-269 ---CGGTGAAACCCCGTCTCTACTAAAAA-----TACAAAAA----TTA  
 AluYd/1-269 ---CGGTGAAACCCCGTCTCTACTAAAAA-----TACAAAAA----TTA  
 19\_Ya5\_173/1-281 ---CGGTGAAACCCCGTCTCTACTAAAAA-----TACAAAAA----TTA  
 125\_Ya5\_C138T/1-281 ---CGGTGAAACCCCGTCTCTACTAAAAA-----TACAAAAA----TTA  
 64\_Ya5\_G25C/1-281 ---CGGTGAAACCCCGTCTCTACTAAAAA-----TACAAAAA----TTA  
 92\_Ya5#-Ya5#\_95/1-278 ---CGGTGAAACCCCGTCTCTACTAAAAA-----TACAAAAA----TTA  
 117\_Ya5\_G159C/1-281 ---CGGTGAAACCCCGTCTCTACTAAAAA-----TACAAAAA----TTA  
 116\_Ya5\_G25C/1-281 ---CGGTGAAACCCCGTCTCTACTAAAAA-----TACAAAAA----TTA  
 119\_Ya5\_G25C/1-281 ---CGGTGAAACCCCGTCTCTACTAAAAA-----TACAAAAA----TTA  
 118\_Ya5\_G159C/1-281 ---CGGTGAAACCCCGTCTCTACTAAAAA-----TACAAAAA----TTA  
 120\_Ya5\_AC275TG/1-281 ---CGGTGAAACCCCGTCTCTACTAAAAA-----TACAAAAA----TTA  
 AluYa5a1/1-281 ---CGGTGAAACCCCGTCTCTACTAAAAA-----TACAAAAA----TTA  
 AluYa5b1/1-281 ---CGGTGAAACCCCGTCTCTACTAAAAA-----TACAAAAA----TTA  
 AluYa5a2/1-282 ---CGGTGAAACCCCGTCTCTACTAAAAA-----TACAAAAA----TTA  
 20\_Ya5\_054/1-285 ---CGGTGAAACCCCGTCTCTACTAAAAA-----TACAAAAA-----TTA  
 AluYa5/1-281 ---CGGTGAAACCCCGTCTCTACTAAAAA-----TACAAAAA----TTA  
 AluYa8/1-280 ---CGGTGAAACCCCGTCTCTACTAAAAA-----TACAAAAA----T-A

|                          |                                                          |
|--------------------------|----------------------------------------------------------|
| 81_Ya5_C150T/1-281       | ---CGGTGAAACCCCGTCTCTACTAAAAA-----TACAAAAA----TTA        |
| AluYa5c1/1-281           | ---CGGTGAAACCCCGTCTCTACTAAAAA-----TACAAAAA----TTA        |
| 124_Ya5_G21A_C23T/1-281  | ---CGGTGAAACCCCGTCTCTACTAAAAA-----TACAAAAA----TTA        |
| 112_Ya5_rtSRPko/1-281    | ---CGGTGAAACCCCGTCTCTACTAAAAA-----TACAAAAA----TTA        |
| 18_Ya5_874/1-281         | ---CGGTGAAACCCCGTCTCTACTAAAAA-----TACAAAAA----TTA        |
| AluYa5b2/1-281           | ---CGGTGAAACCCCGTCTCTACTAAAAA-----TACAAAAA----TTA        |
| 99_Ya5_A131T_C206T/1-281 | ---CGGTGAAACCCCGTCTCTACTAAAAA-----TACAAAATA----TTA       |
| AluYa3_2/1-281           | ---CGGTGAAACCCCGTCTCTACTAAAAA-----TACAAAAA----TTA        |
| AluYa4_1/1-281           | ---CGGTGAAACCCCGTCTCTACTAAAAA-----TACAAAAA----TTA        |
| AluYa3_3/1-281           | ---CGGTGAAACCCCGTCTCTACTAAAAA-----TACAAAAA----TTA        |
| AluYa4_3/1-281           | ---CGGTGAAACCCCGTCTCTACTAAAAA-----TACAAAAA----TTA        |
| AluYa4_2/1-281           | ---CGGTGAAACCCCGTCTCTACTAAAAA-----TACAAAAA----TTA        |
| AluYa4b/1-281            | ---CGGTGAAACCCCGTCTCTACTAAAAA-----TACAAAAA----TTA        |
| AluYa3_1/1-281           | ---CGGTGAAACCCCGTCTCTACTAAAAA-----TACAAAAA----TTA        |
| 15_Ya4_677/1-281         | ---CGGTGAAACCCCGTCTCTACTAAAAA-----TACAAAAA----TTA        |
| 16_Ya4_704/1-283         | AAACGGTGAAACCCCGTCTCTACTAAAAA-----TACAAAAA----TTA        |
| AluYa4/1-281             | ---CGGTGAAACCCCGTCTCTACTAAAAA-----TACAAAAA----TTA        |
| AluYa4_5/1-281           | ---CGGTGAAACCCCGTCTCTACTAAAAA-----TACAAAAA----TTA        |
| AluYa4_4/1-281           | ---CGGTGAAACCCCGTCTCTACTAAAAA-----TACAAAAA----TTA        |
| AluYa3_5/1-281           | ---CGGTGAAACCCCGTCTCTACTAAAAA-----TACAAAAA----TTA        |
| AluYa3_4/1-281           | ---CGGTGAAACCCCGTCTCTACTAAAAA-----TACAAAAA----TTA        |
| AluYa3/1-281             | ---CGGTGAAACCCCGTCTCTACTAAAAA-----TACAAAAA----TTA        |
| AluYa2/1-281             | ---CGGTGAAACCCCGTCTCTACTAAAAA-----TACAAAAA----TTA        |
| 62_Sx-Ya5/1-282          | ---TGGTGAAACCCCGTCTCTACTAAAAA-----TACAAAAA----TTA        |
| AluSc/1-279              | ---TGGTGAAACCCCGTCTCTACTAAAAA-----TACAAAAA----TTA        |
| 108_Sc_h1.1/1-279        | ---TGATGAAACCCCGTCTCTACTAAAAA-----TACAAAAA----TTA        |
| AluSx/1-282              | ---TGGTGAAACCCCGTCTCTACTAAAAA-----TACAAAAA----TTA        |
| 5_Sx_5/1-280             | ---TGGTGAAACCCCGTCTCTACTAAAAA-----TACAAAAA----TTA        |
| 42_Sx_10/1-279           | ---TGGTGAAACCCCGTCTCTACTAAAAA-----TACAAAAA----TTA        |
| 73_Sx_i22T/1-283         | ---TGGTGAAACCCCGTCTCTACTAAAAA-----TACAAAAA----TTA        |
| 4_Sx_13/1-280            | ---TGGTGAAACCCCGTCTCTACTAAAAA-----TACAAAAA----TTA        |
| AluSz/1-282              | ---TGGTGAAACCCCGTCTCTACTAAAAA-----TACAAAAA----TTA        |
| AluSg/1-280              | ---TGGTGAAACCCCGTCTCTACTAAAAA-----TACAAAAA----TTA        |
| 104_Sg_h11.1/1-280       | ---TGGCGAAACCCCGTCTCTACTAAAAA-----TACAAAAA----TTA        |
| AluSp/1-283              | ---TGGAGAAACCCCGTCTCTACTAAAAA-----TACAAAAA----TTA        |
| 105_Sp_h12.1/1-283       | ---TGGAGAAACCCCGTCTCTACTAAAAA-----TACAAAAA----TTA        |
| 8_Sx_425/1-280           | ---TAGTGAAACCCCGTCTCTACTAAAAA-----TACAAAAA----TTA        |
| AluSq/1-283              | ---TGGTGAAACCCCGTCTCTACTAAAAA-----TACAAAAA----TTA        |
| 79_Sx_11/1-282           | ---TGGTGAAACCCCGTCTCTACTAAAAA-----TACAAAAA----TTT        |
| AluJo/1-282              | ---TAGCGAGACCCCGTCTCTACAAAAAA-----TACAAAAA----TTA        |
| 32_Jo_18/1-280           | ---TAGCGAGACCCCGT-TCTACAAAAAA-----TACAAAAA----TTA        |
| 30_Jo_5/1-282            | ---TAGCGAGACCCCGTCTCTACAAAAAA-----TACAAAAA----TTA        |
| AluJb/1-282              | ---TGGTGAAACCCCGTCTCTACAAAAAA-----TACAAAAA----TTA        |
| 63_Jo-Ya5/1-282          | ---TAGCGAGACCCCGTCTCTACAAAAAA-----TACAAAAA----TTA        |
|                          | **   **       *****   **                   *****       * |

|                       |                                                    |
|-----------------------|----------------------------------------------------|
| AluYa1_1/1-281        | GCCGGGCGTAGTGGCGGGCGCCTGTAGTCCCAGCTACTCGG-GAGG-CTG |
| 10_Y_534/1-281        | GCCGGGCGTAGTGGCGGGCGCCTGTAGTCCCAGCTACTCGG-GAGG-CTG |
| 11_Y_h10.1/1-281      | GCCGAGCGTAGTGGCAGGTGCCTGTAGTCCCAGCTACTCAG-GAGG-CTG |
| AluYd6/1-269          | GCCGGGCGCAGTGGCGGGCGCCTGTAGTCCCAGCTACTCGG-GAGG-CTG |
| AluYd8/1-269          | GCCGGGCGCAGTGGCGGGCGCCTGTAGTCCCAGCTACTCGG-GAGG-CTG |
| AluYc5/1-269          | GCCGGGCGCAGTGGCGGGCGCCTGTAGTCCCAGCTACTCGG-GAGG-CTG |
| AluYb10/1-288         | GCCGGGCGGGTGGCGGGCGCCTGTAGTCCCAGCTACTGGG-GAGG-CTG  |
| AluYb11/1-289         | GCCGGGCGGGTGGCGGGCGCCTGTAGTCCCAGCTACTGGG-GAGG-CTG  |
| AluYb8/1-288          | GCCGGGCGGGTGGCGGGCGCCTGTAGTCCCAGCTACTCGG-GAGG-CTG  |
| AluYb9/1-288          | GCCGGGCGGGTGGCGGGCGCCTGTAGTCCCAGCTACTGGG-GAGG-CTG  |
| AluYb7_2/1-288        | GCCGGGCGTGGTGGCGGGCGCCTGTAGTCCCAGCTACTCGG-GAGG-CTG |
| AluYb7_1/1-288        | GCCGGGCGGGTGGCGGGCGCCTGTAGTCCCAGCTACTCGG-GAGG-CTG  |
| AluYb7_3/1-288        | GCCGGGCGGGTGGCGGGCGCCTGTAGTCCCAGCTACTCGG-GAGG-CTG  |
| AluYb6_1/1-288        | GCCGGGCGTGGTGGCGGGCGCCTGTAGTCCCAGCTACTCGG-GAGG-CTG |
| AluYb7_4/1-288        | GCCGGGCGGGTGGCGGGCGCCTGTAGTCCCAGCTACTCGG-GAGG-CTG  |
| AluYb5/1-281          | GCCGGGCGGGTGGCGGGCGCCTGTAGTCCCAGCTACTCGG-GAGG-CTG  |
| AluYb6_2/1-281        | GCCGGGCGGGTGGCGGGCGCCTGTAGTCCCAGCTACTCGG-GAGG-CTG  |
| AluYb3a1/1-281        | GCCGGGCGTGGTGGCGGGCGCCTGTAGTCCCAGCTACTCGG-GAGG-CTG |
| AluYb3a2/1-281        | GCCGGGCGGGTGGCGGGCGCCTGTAGTCCCAGCTACTCGG-GAGG-CTG  |
| AluYbc3a/1-282        | GCCGGGCGTGGTGGCGGGCGCCTGTAGTCCCAGCTACTCGG-GAGG-CTG |
| AluYi6/1-282          | GCCGGGCGTGGTGGCGGGCGCCTGTAGTCCCAGCTACTCGG-GAGG-CTG |
| 111_Yc1_h20.1/1-281   | GCCGGGCGTGGTGGCGGGCGCCTGTAGTCCCAGCTACTCGG-GAGG-CTG |
| AluYg6a2/1-281        | GCCGGGCGTGGTGGCGGGCGCCTGTAGTCCCAGCTACTCGG-GAGG-CTG |
| AluYg6/1-281          | GCCGGGCGTGGTGGCGGGCGCCTGTAGTCCCAGCTACTCGG-GAGG-CTG |
| 22_Yg6_397/1-280      | GCCGGGCGTGGTGGCGGGCGCCTGTAGTCCCAGCTACTCGG-GAGG-CTG |
| 28_Yc1_65/1-280       | GCCGGGCGTGGTGGCGGGCGCCTGTAGTCCCAGCTACTCGG-GAGG-CTG |
| AluYg5b3/1-281        | GCCGGGCGTGGTGGCGGGCGCCTGTAGTCCCAGCTACTCGG-GAGG-CTG |
| 100_Y_h6.1/1-281      | GCCGGGCGTGGTGGCGGGCGCCTGTAGTCCCAGCTACTCGG-GAGG-CTG |
| AluYj4/1-281          | GCCGGGCGTGGTGGCGGGCGCCTGTAGTCCCAGCTACTCGG-GAGG-CTG |
| 50_Yj4_11/1-281       | GCCGGGCGTGGTGGCGGGCGCCTGTAGTCCCAGCTACTCGG-GAGG-CTG |
| AluYj3/1-281          | GCCGGGCGTGGTGGCGGGCGCCTGTAGTCCCAGCTACTCGG-GAGG-CTG |
| 60_Y_h14/1-282        | GCCGGGCGTGGTGGCGGGCGCCTGTAGTCCCAGCTACTCGG-GAGG-CTG |
| AluYh9/1-281          | GCCGGGCGTGGTGGCGGGCGCCTGTAGTCCCAGCTACTCGG-GAGG-CTG |
| 71_Yh9_20/1-282       | GCCGGGCGTGGTGGCGGGCGCCTGTAGTCCCAGCTACTCGG-GAGG-CTG |
| AluYh7/1-281          | GCCGGGCGTGGTGGCGGGCGCCTGTAGTCCCAGCTACTCGG-GAGG-CTG |
| AluYh3/1-281          | GCCGGGCGTGGTGGCGGGCGCCTGTAGTCCCAGCTACTCGG-GAGG-CTG |
| AluYe5/1-280          | GCCGGGCGAGGTGGCGGGCGCCTGTAGTCCCAGCTACTCGG-GAGG-CTG |
| 128_Ye5_d196/1-279    | GCCGGGCGAGGTGGCGGGCGCCTGTAGTCCCAGCTACTCGG-GAGG-CTG |
| AluYe6/1-280          | GCCGGGCGAGGTGGCGGGCGCCTGTAGTCCCAGCTACTCGG-GAGG-CTG |
| AluYe4/1-282          | GCCGGGCGAGGTGGCGGGCGCCTGTAGTCCCAGCTACTCGG-GAGG-CTG |
| AluYe2/1-279          | GCCGGGCGAGGTGGCGGGCGCCTGTAGTCCCAGCTACTCGG-GAGG-CTG |
| 102_Y_T144C/1-281     | GCCGGGCGGGTGGCGGGCGCCTGTAGTCCCAGCTACTCGG-GAGG-CTG  |
| AluYf2/1-283          | GCCGGGCGTGGTGGCGGGCGCCTGTAGTCCCAGCTACTCGG-GAGG-CTG |
| 86_Yf2_38/1-283       | GCCGGGCGTGGTGGCGGGCGCCTGTAAACCCAGCTACGCGG-GAGG-CTG |
| AluYf1/1-281          | GCCGGGCGTGGTGGCGGGCGCCTGTAGTCCCAGCTACTCGG-GAGG-CTG |
| AluY/1-281            | GCCGGGCGTGGTGGCGGGCGCCTGTAGTCCCAGCTACTCGG-GAGG-CTG |
| AluYc1/1-281          | GCCGGGCGTGGTAGCGGGCGCCTGTAGTCCCAGCTACTCGG-GAGG-CTG |
| 25_Yc1_73/1-279       | GCCGGGCGTGGTAGCGGGCGCCTGTAGTCCCAGCTACTCGG-GAGG-CTG |
| AluYc2/1-281          | GCCGGGCGTGGTAGCGGGCGCCTGTAGTCCCAGCTACTCGG-GAGG-CTG |
| 27_Yc1_66/1-280       | GCCGGGCGTGGTAGCGGGCGCCTGTAGTCCCAGCTACTCGG-GAGG-CTG |
| 13_pAlu_A/1-286       | GCCGGGCGTGGTAGCGGGCGCCTGTAGTCCCAGCTACTCGG-GAGG-CTG |
| AluYa1_2/1-281        | GCCGGGCGTAGTGGCGGGCGCCTGTAGTCCCAGCTACTCGG-GAGG-CTG |
| AluYd3a1/1-270        | GCCGGGCGGGTGGCGGGCGCCTGTAGTCCCAGCTACTCGGAGAGG-CTG  |
| AluYd3/1-269          | GCCGGGCGGGTGGCGGGCGCCTGTAGTCCCAGCTACTCGG-GAGG-CTG  |
| AluYd2/1-269          | GCCGGGCGGGTGGCGGGCGCCTGTAGTCCCAGCTACTCGG-GAGG-CTG  |
| AluYd/1-269           | GCCGGGCGGGTGGCGGGCGCCTGTAGTCCCAGCTACTCGG-GAGG-CTG  |
| 19_Ya5_173/1-281      | GCTGGGCGTAGTGGCGGGCGCCTGTAGTCCCAGCTACTTGG-GAGG-CTG |
| 125_Ya5_C138T/1-281   | GCTGGGCGTAGTGGCGGGCGCCTGTAGTCCCAGCTACTTGG-GAGG-CTG |
| 64_Ya5_G25C/1-281     | GCCGGGCGTAGTGGCGGGCGCCTGTAGTCCCAGCTACTTGG-GAGG-CTG |
| 92_Ya5#-Ya5#_95/1-278 | GCCGGGCGTAGTGGCGGGCACAT-CAG--CCAGCTACTTGG-GAGG-CTG |
| 117_Ya5_G159C/1-281   | GCCGGGCGTAGTGGCGGGCGCCTGTAGTCCCAGCTACTTGG-GAGG-CTG |
| 116_Ya5_G25C/1-281    | GCCGGGCGTAGTGGCGGGCGCCTGTAGTCCCAGCTACTTGG-GAGG-CTG |
| 119_Ya5_G25C/1-281    | GCCGGGCGTAGTGGCGGGCGCCTGTAGTCCCAGCTACTTGG-GAGG-CTG |
| 118_Ya5_G159C/1-281   | GCCGGGCGTAGTGGCGGGCGCCTGTAGTCCCAGCTACTTGG-GAGG-CTG |
| 120_Ya5_AC275TG/1-281 | GCCGGGCGTAGTGGCGGGCGCCTGTAGTCCCAGCTACTTGG-GAGG-CTG |
| AluYa5a1/1-281        | GCCGGGCGTAGTGGCGGGCGCCTGTAGTCCCAGCTACTTGG-GAGG-CTG |
| AluYa5b1/1-281        | GCCGGGCGTAGTGGCGGGCGCCTGTGGTCCCAGCTACTTGG-GAGG-CTG |
| AluYa5a2/1-282        | GCCGGGCGTAGTGGCGGGCGCCTGTAGTCCCAGCTACTTGG-GAGG-CTG |
| 20_Ya5_054/1-285      | GCCGGGCGTAGTGGCGGGCGCCTGTAGTCCCAGCTACTTGG-GAGG-CTG |
| AluYa5/1-281          | GCCGGGCGTAGTGGCGGGCGCCTGTAGTCCCAGCTACTTGG-GAGG-CTG |
| AluYa8/1-280          | GCCGGGCGTAGTGGCGGGCGCCTGTAGTCCCAGCTACTTGG-GAGG-CTG |





AluYa1\_1/1-281 AGGCAGGAGAATGGCGT-GAACCC-GGGAGGCGGAGCTTGCAGTGAGCCG  
10\_Y\_534/1-281 AGGCAGGAGAATGGCGT-GAACCC-GGGAGGCGGAGCTTGCAGTGAGCCG  
11\_Y\_h10.1/1-281 AGGCAGGAGAATGGCGT-GAACCC-AGGAGGTGGAGCTTGCAGTGAGCCG  
AluYd6/1-269 AGGCAGGAGAATGGCGT-GAACCC-GGAAGGCGGAGCTTGCAGTGAGCCG  
AluYd8/1-269 AGGCAGGAGAATGGCGT-GAACCC-GGAAGGCGGAGCTTGCAGTGAGCCG  
AluYc5/1-269 AGGCAGGAGAATGGCGT-GAACCC-GGAAGGCGGAGCTTGCAGTGAGCCG  
AluYb10/1-288 AGGCAGGAGAATGGCGT-GAACCC-GGAAGGCGGAGCTTGCAGTGAGCCG  
AluYb11/1-289 AGGCAGGAGAATGGCGT-GAACCC-GGAAGGCGGAGCTTGCAGTGAGCCG  
AluYb8/1-288 AGGCAGGAGAATGGCGT-GAACCC-GGAAGGCGGAGCTTGCAGTGAGCCG  
AluYb9/1-288 AGGCAGGAGAATGGCGT-GAACCC-GGAAGGCGGAGCTTGCAGTGAGCCG  
AluYb7\_2/1-288 AGGCAGGAGAATGGCGT-GAACCC-GGAAGGCGGAGCTTGCAGTGAGCCG  
AluYb7\_1/1-288 AGGCAGGAGAATGGCGT-GAACCC-GGAAGGCGGAGCTTGCAGTGAGCCG  
AluYb7\_3/1-288 AGGCAGGAGAATGGCGT-GAACCC-GGAAGGCGGAGCTTGCAGTGAGCCG  
AluYb6\_1/1-288 AGGCAGGAGAATGGCGT-GAACCC-GGGAGGCGGAGCTTGCAGTGAGCCG  
AluYb7\_4/1-288 AGGCAGGAGAATGGCGT-GAACCC-GGGAGGCGGAGCTTGCAGTGAGCCG  
AluYb5/1-281 AGGCAGGAGAATGGCGT-GAACCC-GGGAGGCGGAGCTTGCAGTGAGCCG  
AluYb6\_2/1-281 AGGCAGGAGAATGGCGT-GAACCC-GGGAGGCGGAGCTTGCAGTGAGCCG  
AluYb3a1/1-281 AGGCAGGAGAATGGCGT-GAACCC-GGGAGGCGGAGCTTGCAGTGAGCCG  
AluYb3a2/1-281 AGGCAGGAGAATGGCGT-GAACCC-GGGAGGCGGAGCTTGCAGTGAGCCG  
AluYbc3a/1-282 AGGCAGGAGAATGGCGT-GAACCC-GGGAGGCGGAGCTTGCAGTGAGCCG  
AluYi6/1-282 AGGCAGGAGAATGGCGT-GAACCC-GGGAGGCGGAGCTTGCAGTGAGCCG  
111\_Yc1\_h20.1/1-281 AGGCAGGAGAATGGCGT-GAACCC-GGGAGGCGGAGCTTGCAGTGAGCCG  
AluYg6a2/1-281 AGGCAGGAGAATGGCGT-GAACCC-GGGAGGCGGAGCTTGCAGTGAGCCG  
AluYg6/1-281 AGGCAGGAGAATGGCGT-GAACCC-GGGAGGCGGAGCTTGCAGTGAGCCG  
22\_Yg6\_397/1-280 AGGCAGGAGAATGGCGT-AAACCC-GGGAGGCGGAGCTTGCAGTGAGCCG  
28\_Yc1\_65/1-280 AGGCAGGAGAATGGCGT-AAACCC-GGGAGGCGGAGCTTGCAGTGAGCCG  
AluYg5b3/1-281 AGGCAGGAGAATGGCGT-GAACCC-GGGAGGCGGAGCTTGCAGTGAGCCG  
100\_Y\_h6.1/1-281 AGGCAGGAGAATGGCGT-GAACCC-GGGAGGCGGAGCTTGCAGTGAGCCG  
AluYj4/1-281 AGGCAGGAGAATGGCGT-GAACCC-GGGAGGCGGAGCTTGCAGTGAGCCG  
50\_Yj4\_11/1-281 AGGCAGGAGAATGGCGT-GAACCC-GGGAGGCGGAGCTTGCAGTGAGCCG  
AluYj3/1-281 AGGCAGGAGAATGGCGT-GAACCC-GGGAGGCGGAGCTTGCAGTGAGCCG  
60\_Y\_h14/1-282 AGGCAGGAGAATGGCAT-GAACCA-GTGAGGCGGAGCTTGCAGTGAGCCG  
AluYh9/1-281 AGGCAGGAGAATGGCGT-GAACCC-GGGAGGCGGAGCTTGCAGTGAGCCG  
71\_Yh9\_20/1-282 AGGCAGGAGAATGGCGT-GAACCC-GGGAGGCGGAGCTTGCAGTGAGCCG  
AluYh7/1-281 AGGCAGGAGAATGGCGT-GAACCC-GGGAGGCGGAGCTTGCAGTGAGCCG  
AluYh3/1-281 AGGCAGGAGAATGGCGT-GAACCC-GGGAGGCGGAGCTTGCAGTGAGCCG  
AluYe5/1-280 AGGCAGGAGAATGGCGT-GAACCCGGGGGGGCGGAGCTTGCAGTGAGCCG  
128\_Ye5\_d196/1-279 AGGCAGGAGAATG-CGT-GAACCCGGGGGGGCGGAGCTTGCAGTGAGCCG  
AluYe6/1-280 AGGCAGGAGAATGGCGT-GAACCCGGGGGGGCGGAGCTTGCAGTGAGCCG  
AluYe4/1-282 AGGCAGGAGAATGGCGT-GAACCCGGGGGGGCGGAGCTTGCAGTGAGCCG  
AluYe2/1-279 AGGCAGGAGAATGGCGT-GAACCC-GGGAGGCGGAGCTTGCAGTGAGCCG  
102\_Y\_T144C/1-281 AGGCAGGAGAATGGCGT-GAACCC-GGGAGGCGGAGCTTGCAGTGAGCCG  
AluYf2/1-283 AGGCAGGAGAATGGCGT-GAACCC-GGGAGGCGGAGCTTGCAGTGAGCCG  
86\_Yf2\_38/1-283 AGGCAGGAGAATGGCAT-GAACCC-GGGAGGCGGAGCTTGCAGTGAGCCG  
AluYf1/1-281 AGGCAGGAGAATGGCGT-GAACCC-GGGAGGCGGAGCTTGCAGTGAGCCG  
AluY/1-281 AGGCAGGAGAATGGCGT-GAACCC-GGGAGGCGGAGCTTGCAGTGAGCCG  
AluYc1/1-281 AGGCAGGAGAATGGCGT-GAACCC-GGGAGGCGGAGCTTGCAGTGAGCCG  
25\_Yc1\_73/1-279 AGGCAGGAGAATGGCGT-GA-CCC-GGGAGGCGGAGCTTGCAGTGAGCCG  
AluYc2/1-281 AGGCAGGAGAATGGCGT-GAACCC-GGGAGGCGGAGCTTGCAGTGAGCCG  
27\_Yc1\_66/1-280 AGGCAGGAGAATGGCGT-GAACCC-GGGAGGCGGAGCTTGCAGTGAGCCG  
13\_pAlu\_A/1-286 AGGCAGGAGAATGGCGT-GAACCC-GGGAGGCGGAGCTTGCAGTGAGCCG  
AluYa1\_2/1-281 AGGCAGGAGAATGGCGT-GAACCC-GGGAGGCGGAGCTTGCAGTGAGCCG  
AluYd3a1/1-270 AGGCAGGAGAATGGCGT-GAACCC-GGGAGGCGGAGCTTGCAGTGAGCCG  
AluYd3/1-269 AGGCAGGAGAATGGCGT-GAACCC-GGGAGGCGGAGCTTGCAGTGAGCCG  
AluYd2/1-269 AGGCAGGAGAATGGCGT-GAACCC-GGGAGGCGGAGCTTGCAGTGAGCCG  
AluYd/1-269 AGGCAGGAGAATGGCGT-GAACCC-GGGAGGCGGAGCTTGCAGTGAGCCG  
19\_Ya5\_173/1-281 AGGCAGGAGAATGGCGT-GAACCC-AGGAGGCGGAGCTTGCAGTGAGCCG  
125\_Ya5\_C138T/1-281 AGGCAGGAGAATGGCGT-GAACCC-GGGAGGCGGAGCTTGCAGTGAGCCG  
64\_Ya5\_G25C/1-281 AGGCAGGAGAATGGCGT-GAACCC-GGGAGGCGGAGCTTGCAGTGAGCCG  
92\_Ya5#-Ya5#\_95/1-278 AGGCAGGAGAATGGCGT-GAACCC-GGGAGGCGGAGCTTGCAGTGAGCCG  
117\_Ya5\_G159C/1-281 AGGCAGGAGAATGGCGT-GAACCC-GGGAGGCGGAGCTTGCAGTGAGCCG  
116\_Ya5\_G25C/1-281 AGGCAGGAGAATGGCGT-GAACCC-GGGAGGCGGAGCTTGCAGTGAGCCG  
119\_Ya5\_G25C/1-281 AGGCAGGAGAATGGCGT-GAACCC-GGGAGGCGGAGCTTGCAGTGAGCCG  
118\_Ya5\_G159C/1-281 AGGCAGGAGAATGGCGT-GAACCC-GGGAGGCGGAGCTTGCAGTGAGCCG  
120\_Ya5\_AC275TG/1-281 AGGCAGGAGAATGGCGT-GAACCC-GGGAGGCGGAGCTTGCAGTGAGCCG  
AluYa5a1/1-281 AGGCAGGAGAATGGCGT-GAACCC-GGGAGGCGGAGCTTGCAGTGAGCCG  
AluYa5b1/1-281 AGGCAGGAGAATGGCGT-GAACCC-GGGAGGCGGAGCTTGCAGTGAGCCG  
AluYa5a2/1-282 AGGCAGGAGAATGGCGT-GAACCC-GGGAGGCGGAGCTTGCAGTGAGCCG  
20\_Ya5\_054/1-285 AGGCAGGAGAATGGCGT-GAACCC-GGGAGGCGGAGCTTGCAGTGAGCCG  
AluYa5/1-281 AGGCAGGAGAATGGCGT-GAACCC-GGGAGGCGGAGCTTGCAGTGAGCCG  
AluYa8/1-280 AGGCAGGAGAATGGCGT-GAACCC-GGGAGGCGGAGCTTGCAGTGAGCCG

81\_Ya5\_C150T/1-281  
 AluYa5c1/1-281  
 124\_Ya5\_G21A\_C23T/1-281  
 112\_Ya5\_rtSRPko/1-281  
 18\_Ya5\_874/1-281  
 AluYa5b2/1-281  
 99\_Ya5\_A131T\_C206T/1-281  
 AluYa3\_2/1-281  
 AluYa4\_1/1-281  
 AluYa3\_3/1-281  
 AluYa4\_3/1-281  
 AluYa4\_2/1-281  
 AluYa4b/1-281  
 AluYa3\_1/1-281  
 15\_Ya4\_677/1-281  
 16\_Ya4\_704/1-283  
 AluYa4/1-281  
 AluYa4\_5/1-281  
 AluYa4\_4/1-281  
 AluYa3\_5/1-281  
 AluYa3\_4/1-281  
 AluYa3/1-281  
 AluYa2/1-281  
 62\_Sx-Ya5/1-282  
 AluSc/1-279  
 108\_Sc\_h1.1/1-279  
 AluSx/1-282  
 5\_Sx\_5/1-280  
 42\_Sx\_10/1-279  
 73\_Sx\_i22T/1-283  
 4\_Sx\_13/1-280  
 AluSz/1-282  
 AluSg/1-280  
 104\_Sg\_h11.1/1-280  
 AluSp/1-283  
 105\_Sp\_h12.1/1-283  
 8\_Sx\_425/1-280  
 AluSq/1-283  
 79\_Sx\_11/1-282  
 AluJo/1-282  
 32\_Jo\_18/1-280  
 30\_Jo\_5/1-282  
 AluJb/1-282  
 63\_Jo-Ya5/1-282

AGGCAGGAGAATGGCGT-GAACCC-GGGAGGCGGAGCTTGCAGTGAGCCG  
 AGGCAGGAGAATGGCGT-GAACCC-GGGAGGCGGAGCTTGCAGTGAGCCG  
 AGGCAGGAGAATGGCGT-GAACCC-GGGAGGCGGAGCTTGCAGTGAGCCG  
 AGGCAGGAGTTACCCGT-GAACCC-GGGAGGCGGAGCTTGCAGTGAGCCG  
 AGGCAGGAGAATGGCGT-GAACCC-GGGAGGCGGAGCTTGCAGTGAGCTG  
 AGGCAGGAGAATGGCGT-GAACCC-GGGAGGCGGAGCTTGCAGTGAGCCG  
 AGGCAGGAGAATGGCGT-GAACCT-GGGAGGCGGAGCTTGCAGTGAGCCG  
 AGGCAGGAGAATGGCGT-GAACCC-GGGAGGCGGAGCTTGCAGTGAGCCG  
 \* \* \* \* \*

AluYa1\_1/1-281 AGATCGCGCCACTGCACCTCC-----AGCCTGGGCGACA-GAGCGAGAC  
 10\_Y\_534/1-281 AGATCGCGCCACTGCACCTCC-----AGCCTGGGCGACA-GAGCGAGAC  
 11\_Y\_h10.1/1-281 AGATTGCGCCACTGCACCTCC-----AGCCTGGGCGACA-GAGCGAGAC  
 AluYd6/1-269 AGATCGCGCCACAGCACTCC-----CGCCTGGGCGACA-GAACGAGAC  
 AluYd8/1-269 AGATCGCGCCACAGCACTCC-----CGCCTGGGCGACA-GAACGAGAC  
 AluYc5/1-269 AGATCGCGCCACAGCACTCC-----CGCCTGGGCGACA-GAGCGAGAC  
 AluYb10/1-288 AGATTGCGCCACTGCAGTCCGAGTCCAGCCTGGGCGACA-GAGCGAGAC  
 AluYb11/1-289 AGATTGCGCCACTGCAGTCCGAGTCCAGCCTGGGCGACA-GAGCGAGAC  
 AluYb8/1-288 AGATTGCGCCACTGCAGTCCGAGTCCGAGTCCGAGCCTGGGCGACA-GAGCGAGAC  
 AluYb9/1-288 AGATTGCGCCACTGCAGTCCGAGTCCGAGTCCGAGCCTGGGCGACA-GAGCGAGAC  
 AluYb7\_2/1-288 AGATTGCGCCACTGCAGTCCGAGTCCGAGTCCGAGCCTGGGCGACA-GAGCGAGAC  
 AluYb7\_1/1-288 AGATCGCGCCACTGCAGTCCGAGTCCGAGTCCGAGCCTGGGCGACA-GAGCGAGAC  
 AluYb7\_3/1-288 AGATTGCGCCACTGCAGTCCGAGTCCGAGTCCGAGCCTGGGCGACA-GAGCGAGAC  
 AluYb6\_1/1-288 AGATTGCGCCACTGCAGTCCGAGTCCGAGTCCGAGCCTGGGCGACA-GAGCGAGAC  
 AluYb7\_4/1-288 AGATTGCGCCACTGCAGTCCGAGTCCGAGTCCGAGCCTGGGCGACA-GAGCGAGAC  
 AluYb5/1-281 AGATTGCGCCACTGCACCTCC-----AGCCTGGGCGACA-GAGCGAGAC  
 AluYb6\_2/1-281 AGATTGCGCCACTGCACCTCC-----AGCCTGGGCGACA-GAGCGAGAC  
 AluYb3a1/1-281 AGATTGCGCCACTGCAGTCC-----AGCCTGGGCGACA-GAGCGAGAC  
 AluYb3a2/1-281 AGATAGCGCCACTGCAGTCC-----GGCCTGGGCGAAA-GAGCGAGAC  
 AluYbc3a/1-282 AGATAGCGCCACTGCAGTCC-----AGCCTGGGCGAAA-GAGCGAGAC  
 AluYi6/1-282 AGATTGCGCCACTGCACCTCC-----CGCCTGGGCCACA-GAGCGAGAC  
 111\_Yc1\_h20.1/1-281 AGATTGCGCCACTGCACCTCC-----CACCTGGGCCACA-GAGCGAGAC  
 AluYg6a2/1-281 AGATCGCGCCACTGCACCTCC-----AGCCTGGGCGACA-GAGCGAAAC  
 AluYg6/1-281 AGATCGCGCCACTGCACCTCC-----AGCCTGGGCGACA-GAGCGAAAC  
 22\_Yg6\_397/1-280 AGATCGCGCCACTGCACCTCC-----AGCCTGGGCGACA-GAGCGAAAC  
 28\_Yc1\_65/1-280 AGATCGCGCCACTGCACCTCC-----AGCCTGGGCGACA-GAGCGAAAC  
 AluYg5b3/1-281 AGATCGCGCCACTGCAGTCC-----AGCCTGGGCGACA-GAGCGAAAC  
 100\_Y\_h6.1/1-281 ACATCGCCACTGCACCTCC-----AGCCTGGTGCACA-GAGCGAGAC  
 AluYj4/1-281 AGATCGTGCCTGCACCTCC-----AGCCTGGGCGACA-GAGCGAGAC  
 50\_Yj4\_11/1-281 AGATCGTGCCTGCACCTCC-----AGCCTGGGCGACA-GAGCGAGAC  
 AluYj3/1-281 AGATCGTGCCTGCACCTCC-----AGCCTGGGCGACA-GAGCGAGAC  
 60\_Y\_h14/1-282 AGATCATGCCACTGCACCTCC-----AACCTGGGCGACA-GAGCGAGAC  
 AluYh9/1-281 AGGTGCGCCACTGCACCTCC-----AGCCTGGGCGACA-GAGCGAGAC  
 71\_Yh9\_20/1-282 AGGTGCGCCACTGCACCTCC-----AGCCTGGGCGACA-GAGCGAGAC  
 AluYh7/1-281 AGGTGCGCCACTGCACCTCC-----AGCCTGGGCGACA-GAGCGAGAC  
 AluYh3/1-281 AGATCGCGCCACTGCACCTCC-----AGCCTGGGCGACA-GAGCGAGAC  
 AluYe5/1-280 AGATCGCGCCACTGCACCTCC-----AGCCTGGGCGACA-G--CGAGAC  
 128\_Ye5\_d196/1-279 AGATCGCGCCACTGCACCTCC-----AGCCTGGGCGACA-G--CGAGAC  
 AluYe6/1-280 AGATCGCGCCACTGCACCTCC-----AACCTGGGCGACA-G--CGAGAC  
 AluYe4/1-282 AGATCGCGCCACTGCACCTCC-----AGCCTGGGCGACA-GAGCGAGAC  
 AluYe2/1-279 AGATCGCGCCACTGCACCTCC-----AGCCTGGGCGACA-G--CGAGAC  
 102\_Y\_T144C/1-281 AGATCGCGCCACTGCACCTCC-----AGCCTGGGCGACA-GAGCGAGAC  
 AluYf2/1-283 AGATCGCGCCACTGCACCTCC-----AGCCTGGGCGACA-GAGCGAGAC  
 86\_Yf2\_38/1-283 AGATCGCGCCACTGCACCTCC-----AGCCTGGGCGACA-GAGCGAGAC  
 AluYf1/1-281 AGATCGCGCCACTGCACCTCC-----AGCCTGGGCGACA-GAGCGAGAC  
 AluY/1-281 AGATCGCGCCACTGCACCTCC-----AGCCTGGGCGACA-GAGCGAGAC  
 AluYc1/1-281 AGATCGCGCCACTGCACCTCC-----AGCCTGGGCGACA-GAGCGAGAC  
 25\_Yc1\_73/1-279 AGATCGCGCCA-TGCACCTCC-----AGCCTGGGCGACA-GAGCGAGAC  
 AluYc2/1-281 AGATCGCGCCACTGCACCTCC-----AGCCTGGGCGACA-GAGCGAGAC  
 27\_Yc1\_66/1-280 AGATCGCGCCACTGCACCTCC-----AGCCTGGGCGACA-GAGCGAGAC  
 13\_pAlu\_A/1-286 AGATCCCGCCACTGCACCTCC-----AGCCTGGGCGACA-GAGCGAGAC  
 AluYa1\_2/1-281 AGATCCCGCCACTGCACCTCC-----AGCCTGGGCGACA-GAGCGAGAC  
 AluYd3a1/1-270 AGATCGCGCCACTGCACCTCC-----AGCCTGGGCGACA-GAGCGAGAC  
 AluYd3/1-269 AGATCGCGCCACTGCACCTCC-----AGCCTGGGCGACA-GAGCGAGAC  
 AluYd2/1-269 AGATCGCGCCACTGCACCTCC-----AGCCTGGGCGACA-GAGCGAGAC  
 AluYd/1-269 AGATCGCGCCACTGCACCTCC-----AGCCTGGGCGACA-GAGCGAGAC  
 19\_Ya5\_173/1-281 AGATCCCGCCACTGCACCTCC-----AGCCTGGGCGACA-GAGCGAGAC  
 125\_Ya5\_C138T/1-281 AGATCCCGCCACTGCACCTCC-----AGCCTGGGCGACA-GAGCGAGAC  
 64\_Ya5\_G25C/1-281 AGATCCCGCCACTGCACCTCC-----AGCCTGGGCGACA-GAGCGAGAC  
 92\_Ya5#-Ya5#\_95/1-278 AGATCCCGCCACTGCACCTCC-----AGCCTGGGCGACA-GAGCGAGAC  
 117\_Ya5\_G159C/1-281 AGATCCCGCCACTGCACCTCC-----AGCCTGGGCGACA-GAGCGAGAC  
 116\_Ya5\_G25C/1-281 AGATCCCGCCACTGCACCTCC-----AGCCTGGGCGACA-GAGCGAGT  
 119\_Ya5\_G25C/1-281 AGATCCCGCCACTGCACCTCC-----AGCCTGGGCGACA-GAGCGAGT  
 118\_Ya5\_G159C/1-281 AGATCCCGCCACTGCACCTCC-----AGCCTGGGCGACA-GAGCGAGT  
 120\_Ya5\_AC275TG/1-281 AGATCCCGCCACTGCACCTCC-----AGCCTGGGCGACA-GAGCGAGT  
 AluYa5a1/1-281 AGATCCCGCCACTGCACCTCC-----AGCCTGGGCGACA-GAGCGAGAC  
 AluYa5b1/1-281 AGATCCCGCCACTGCACCTCC-----AGCCTGGGCGACA-GAGCGAGAC  
 AluYa5a2/1-282 AGATCCCGCCACTGCACCTCC-----AGCCTGGGCGACA-GAGCGAGAC  
 20\_Ya5\_054/1-285 AGATCCCGCCACTGCACCTCC-----AGCCTGGGCGACA-GAGCGAGAC  
 AluYa5/1-281 AGATCCCGCCACTGCACCTCC-----AGCCTGGGCGACA-GAGCGAGAC  
 AluYa8/1-280 AGATCCCGCCACTGCACCTCC-----AGCCTGGGCGACA-GAGCGAGAC

|                          |                                                                        |
|--------------------------|------------------------------------------------------------------------|
| 81_Ya5_C150T/1-281       | AGATCCCGCCACTGCACTCC-----AGCCTGGGCGACA-GAGCGAGAC                       |
| AluYa5c1/1-281           | AGGTCCCGCCACTGCACTCC-----AGCCTGGGCGACA-GAGCGAGAC                       |
| 124_Ya5_G21A_C23T/1-281  | AGATCCCGCCACTGCACTCC-----AGCCTGGGCGACA-GAGCGAGAC                       |
| 112_Ya5_rtSRPko/1-281    | AGATCCCGCCACTGCACTCC-----AGCCTGGGCGACA-GAGCGAGAC                       |
| 18_Ya5_874/1-281         | AGATCCCGCCACTGCACTCC-----AGCCTGGGCGACA-GAGCGAGAC                       |
| AluYa5b2/1-281           | AGATCCCGCCACTGCACTCC-----AGCCTGGGCGACA-GAGCGAGAC                       |
| 99_Ya5_A131T_C206T/1-281 | AGATCCCGCCACTGCACTCC-----AGCCTGGGCGACA-GAGCGAGAC                       |
| AluYa3_2/1-281           | AGATCCCGCCACTGCACTCC-----AGCCTGGGCGACA-GAGCGAGAC                       |
| AluYa4_1/1-281           | AGATCCCGCCACTGCACTCC-----AGCCTGGGCGACA-GAGCGAGAC                       |
| AluYa3_3/1-281           | AGATCCCGCCACTGCACTCC-----AGCCTGGGCGACA-GAGCGAGAC                       |
| AluYa4_3/1-281           | AGATCCCGCCACTGCACTCC-----AGCCTGGGCGACA-GAGCGAGAC                       |
| AluYa4_2/1-281           | AGATCCCGCCACTGCACTCC-----AGCCTGGGCGACA-GAGCGAGAC                       |
| AluYa4b/1-281            | AGATCCCGCCACTGCACTCC-----AGCCTGGGCGACA-GAGCGAGAC                       |
| AluYa3_1/1-281           | AGATCCCGCCACTGCACTCC-----AGCCTGGGCGACA-GAGCGAGAC                       |
| 15_Ya4_677/1-281         | AGATCGTGCCACTGCACTCC-----AGCCTGGGCGACA-GAGCGAGAC                       |
| 16_Ya4_704/1-283         | AGATCGCGCCACTGCACTCC-----AGCCTGGGCGACA-GAGCGAGAC                       |
| AluYa4/1-281             | AGATCGCGCCACTGCACTCC-----AGCCTGGGCGACA-GAGCGAGAC                       |
| AluYa4_5/1-281           | AGATCGCGCCACTGCACTCC-----AGCCTGGGCGACA-GAGCGAGAC                       |
| AluYa4_4/1-281           | AGATCCCGCCACTGCACTCC-----AGCCTGGGCGACA-GAGCGAGAC                       |
| AluYa3_5/1-281           | AGATCGCGCCACTGCACTCC-----AGCCTGGGCGACA-GAGCGAGAC                       |
| AluYa3_4/1-281           | AGATCCCGCCACTGCACTCC-----AGCCTGGGCGACA-GAGCGAGAC                       |
| AluYa3/1-281             | AGATCCCGCCACTGCACTCC-----AGCCTGGGCGACA-GAGCGAGAC                       |
| AluYa2/1-281             | AGATCGCGCCACTGCACTCC-----AGCCTGGGCGACA-GAGCGAGAC                       |
| 62_Sx-Ya5/1-282          | AGATCCCGCCACTGCACTCC-----AGCCTGGGCGACA-GAGCGAGAC                       |
| AluSc/1-279              | AGATCGCGCCACTGCACTCC-----AGCCTGG-CGACA-GAGCGAGAC                       |
| 108_Sc_h1.1/1-279        | ACATCGCGCCACTGCACTCC-----AGCCTGG-CGACA-GAGCAAGAC                       |
| AluSx/1-282              | AGATCGCGCCACTGCACTCC-----AGCCTGGGCGACA-GAGCGAGAC                       |
| 5_Sx_5/1-280             | AGATCGCGCCACTGCACTCC-----AGCCTGGGCGACA-GAGCGAGAC                       |
| 42_Sx_10/1-279           | AGATCGCGCCACTGCACTCC-----AGCCTGGGCGACA-GAGCGAGAC                       |
| 73_Sx_i22T/1-283         | AGATCGCGCCACTGCACTCC-----AGCCTGGGCGACA-GAGCGAGAC                       |
| 4_Sx_13/1-280            | AGATCGCGCCACTGCACTCC-----AGCCTGGGCGACA-GAGCGAGAC                       |
| AluSz/1-282              | AGATCGCGCCACTGCACTCC-----AGCCTGGGCGACA-GAGCGAGAC                       |
| AluSg/1-280              | AGATCGCGCCACTGCACTCC-----AGCCTGGGCGACA-GAGCGAGAC                       |
| 104_Sg_h11.1/1-280       | AGATCGCACCACTGCACTCC-----AGCCTGGGTGACA-GAGCGAGAC                       |
| AluSp/1-283              | AGATCGCGCCATTGCACTCC-----AGCCTGGGCAACAAGAGCGAAAC                       |
| 105_Sp_h12.1/1-283       | AGATCGCGCCATTGCACTCC-----AGCCTGGGCAACAAAAGTGAAC                        |
| 8_Sx_425/1-280           | AGATCGCGCCATTGCACTCC-----AGCCTGG-CAACA-GAGCGAGAC                       |
| AluSq/1-283              | AGATCGCGCCACTGCACTCC-----AGCCTGGGCAACAAGAGCGAAAC                       |
| 79_Sx_11/1-282           | AGATCGCGCCACTGCACTCC-----AGCCTGGGCGACA-GAGCGAGAC                       |
| AluJo/1-282              | TGATCGCGCCACTGCACTCC-----AGCCTGGGCGACA-GAGCGAGAC                       |
| 32_Jo_18/1-280           | TGATCGCGCCACTGCACTCC-----AGCCTGGGCGACA-GAGCGAGAC                       |
| 30_Jo_5/1-282            | TGATCGCGCCACTGCACTCC-----AGCCTGGGCGACA-GAGCGAGAC                       |
| AluJb/1-282              | TGATCGCGCCACTGCACTCC-----AGCCTGGGCGACA-GAGCGAGAC                       |
| 63_Jo-Ya5/1-282          | AGATCCCGCCACTGCACTCC-----AGCCTGGGCGACA-GAGCGAGAC                       |
|                          | *        ***    **    **                    *****   *   *            * |

|                       |          |
|-----------------------|----------|
| AluYa1_1/1-281        | TCCGTCTC |
| 10_Y_534/1-281        | TCCGTCTC |
| 11_Y_h10.1/1-281      | TCCGTCTC |
| AluYd6/1-269          | TCCGTCTC |
| AluYd8/1-269          | TCCGTCTC |
| AluYc5/1-269          | TCCGTCTC |
| AluYb10/1-288         | TCCGTCTC |
| AluYb11/1-289         | TCCGTCTC |
| AluYb8/1-288          | TCCGTCTC |
| AluYb9/1-288          | TCCGTCTC |
| AluYb7_2/1-288        | TCCGTCTC |
| AluYb7_1/1-288        | TCCGTCTC |
| AluYb7_3/1-288        | TCCGTCTC |
| AluYb6_1/1-288        | TCCGTCTC |
| AluYb7_4/1-288        | TCCGTCTC |
| AluYb5/1-281          | TCCGTCTC |
| AluYb6_2/1-281        | TCCGTCTC |
| AluYb3a1/1-281        | TCCGTCTC |
| AluYb3a2/1-281        | TCCGTCTC |
| AluYbc3a/1-282        | TCCGTCTC |
| AluYi6/1-282          | TCCGTCTC |
| 111_Yc1_h20.1/1-281   | TCCGTCTC |
| AluYg6a2/1-281        | TCCGTCTC |
| AluYg6/1-281          | TCCGTCTC |
| 22_Yg6_397/1-280      | TCCGTCTC |
| 28_Yc1_65/1-280       | TCCGTCTC |
| AluYg5b3/1-281        | TCCGTCTC |
| 100_Y_h6.1/1-281      | TCCGTCTC |
| AluYj4/1-281          | TCCGTCTC |
| 50_Yj4_11/1-281       | TCCGTCTC |
| AluYj3/1-281          | TCCGTCTC |
| 60_Y_h14/1-282        | CCTGTCTC |
| AluYh9/1-281          | TCCGTCTC |
| 71_Yh9_20/1-282       | TCCGTCTC |
| AluYh7/1-281          | TCCGTCTC |
| AluYh3/1-281          | TCCGTCTC |
| AluYe5/1-280          | TCCGTCTC |
| 128_Ye5_d196/1-279    | TCCGTCTC |
| AluYe6/1-280          | TCCGTCTC |
| AluYe4/1-282          | TCCGTCTC |
| AluYe2/1-279          | TCCGTCTC |
| 102_Y_T144C/1-281     | TCCGTCTC |
| AluYf2/1-283          | TCCGTCTC |
| 86_Yf2_38/1-283       | TCCGTCTC |
| AluYf1/1-281          | TCCGTCTC |
| AluY/1-281            | TCCGTCTC |
| AluYc1/1-281          | TCCGTCTC |
| 25_Yc1_73/1-279       | TCCGTCTC |
| AluYc2/1-281          | TCCGTCTC |
| 27_Yc1_66/1-280       | TCCGTCTC |
| 13_pAlu_A/1-286       | TCCGTCTC |
| AluYa1_2/1-281        | TCCGTCTC |
| AluYd3a1/1-270        | TCCGTCTC |
| AluYd3/1-269          | TCCGTCTC |
| AluYd2/1-269          | TCCGTCTC |
| AluYd/1-269           | TCCGTCTC |
| 19_Ya5_173/1-281      | TCCGTCTC |
| 125_Ya5_C138T/1-281   | TCCGTCTC |
| 64_Ya5_G25C/1-281     | TCCGTCTC |
| 92_Ya5#-Ya5#_95/1-278 | TCCGTCTC |
| 117_Ya5_G159C/1-281   | TCCGTCTC |
| 116_Ya5_G25C/1-281    | TCCGTCTC |
| 119_Ya5_G25C/1-281    | TCCGTCTC |
| 118_Ya5_G159C/1-281   | TCCGTCTC |
| 120_Ya5_AC275TG/1-281 | TCCGTCTC |
| AluYa5a1/1-281        | TCCGTCTC |
| AluYa5b1/1-281        | TCCGTCTC |
| AluYa5a2/1-282        | TCCGTCTC |
| 20_Ya5_054/1-285      | TCCGTCTC |
| AluYa5/1-281          | TCCGTCTC |
| AluYa8/1-280          | TCCGTCTC |

|                          |          |
|--------------------------|----------|
| 81_Ya5_C150T/1-281       | TCCGTCTC |
| AluYa5c1/1-281           | TCCGTCTC |
| 124_Ya5_G21A_C23T/1-281  | TCCGTCTC |
| 112_Ya5_rtSRPko/1-281    | TCCGTCTC |
| 18_Ya5_874/1-281         | TCCGTCTC |
| AluYa5b2/1-281           | TCCGTCTC |
| 99_Ya5_A131T_C206T/1-281 | TCCGTCTC |
| AluYa3_2/1-281           | TCCGTCTC |
| AluYa4_1/1-281           | TCCGTCTC |
| AluYa3_3/1-281           | TCCGTCTC |
| AluYa4_3/1-281           | TCCGTCTC |
| AluYa4_2/1-281           | TCCGTCTC |
| AluYa4b/1-281            | TCCGTCTC |
| AluYa3_1/1-281           | TCCGTCTC |
| 15_Ya4_677/1-281         | TCCGTCTC |
| 16_Ya4_704/1-283         | TCCGTCTC |
| AluYa4/1-281             | TCCGTCTC |
| AluYa4_5/1-281           | TCCGTCTC |
| AluYa4_4/1-281           | TCCGTCTC |
| AluYa3_5/1-281           | TCCGTCTC |
| AluYa3_4/1-281           | TCCGTCTC |
| AluYa3/1-281             | TCCGTCTC |
| AluYa2/1-281             | TCCGTCTC |
| 62_Sx-Ya5/1-282          | TCCGTCTC |
| AluSc/1-279              | TCCGTCTC |
| 108_Sc_h1.1/1-279        | TCTGTCTC |
| AluSx/1-282              | TCCGTCTC |
| 5_Sx_5/1-280             | TCCGTCTC |
| 42_Sx_10/1-279           | TCCGTCTC |
| 73_Sx_i22T/1-283         | TCCGTCTC |
| 4_Sx_13/1-280            | TCCGTCTC |
| AluSz/1-282              | TCCGTCTC |
| AluSg/1-280              | TCCGTCTC |
| 104_Sg_h11.1/1-280       | TCCATCTC |
| AluSp/1-283              | TCCGTCTC |
| 105_Sp_h12.1/1-283       | TCCGTCTC |
| 8_Sx_425/1-280           | TCCGTCTC |
| AluSq/1-283              | TCCGTCTC |
| 79_Sx_11/1-282           | TCCGTCTC |
| AluJo/1-282              | CCTGTCTC |
| 32_Jo_18/1-280           | CCTGTCTC |
| 30_Jo_5/1-282            | CCTGTCTC |
| AluJb/1-282              | CCTGTCTC |
| 63_Jo-Ya5/1-282          | TCCGTCTC |
|                          | * ****   |
