# Supplementary material for: Active Alu retrotransposons in the human genome
Source: HighWire-hosted journal article supplement (doi:10.1101/gr.081737.108), 2008-10-03
Supplement: Supplemental_Table_2.pdf [file Supplemental_Table_2.pdf]

**Supplementary Table 2**

| Figures | reference RNA | competitor RNA   | $\Delta\Delta G$<br>(kcal/mol) | error $\Delta\Delta G$<br>(kcal/mol) | p-value | affinity loss<br>(fold) | affinity gain<br>(fold) |
|---------|---------------|------------------|--------------------------------|--------------------------------------|---------|-------------------------|-------------------------|
| Fig 4 e | SRP (t.)      | Jo (L.)          | 0.19                           | 0.08                                 | 1.4E-01 | 1.4                     |                         |
|         |               | Sx (L.)          | 1.19                           | 0.11                                 | 8.4E-03 | 7.5                     |                         |
|         |               | Y (L.)           | 1.33                           | 0.11                                 | 6.2E-03 | 9.5                     |                         |
|         |               | Ya5 (L.)         | 1.14                           | 0.01                                 | 7.7E-05 | 6.9                     |                         |
|         |               | Jo (R.)          | -0.26                          | 0.07                                 | 6.1E-02 |                         | 1.6                     |
|         |               | Sx (R.)          | 2.12                           | 0.14                                 | 4.3E-03 | 36                      |                         |
|         |               | Y (R.)           | 2.10                           | 0.03                                 | 2.3E-04 | 35                      |                         |
|         |               | Ya5 (R.)         | 2.23                           | 0.06                                 | 6.6E-04 | 43                      |                         |
| Fig 4 d | Ya5 (L.)      | SRP (t.)         | -1.61                          | 0.12                                 | 5.7E-03 |                         | 15                      |
|         |               | Ya5 (L.) G25C    | 2.43                           | 0.14                                 | 3.4E-03 | 61                      |                         |
|         |               | Ya5 (R.)         | 0.67                           | 0.03                                 | 2.4E-03 | 3                       |                         |
|         | Ya5 (R.)      | SRP (t.)         | -2.44                          | 0.24                                 | 9.3E-03 |                         | 61                      |
|         |               | Ya5 (R.) G159C   | 3.30                           | 0.14                                 | 1.9E-03 | 265                     |                         |
|         |               | Ya5 (L.)         | -0.85                          | 0.06                                 | 4.4E-03 |                         | 4.2                     |
|         |               | non-specific RNA | 3.21                           | 0.25                                 | 6.0E-03 | 226                     |                         |
