# Supplementary material for: Active Alu retrotransposons in the human genome
Source: HighWire-hosted journal article supplement (doi:10.1101/gr.081737.108), 2008-10-03
Supplement: Supplemental_Table_3.pdf [file Supplemental_Table_3.pdf]

**Supplemental Table 3.** Alu elements with mutations in positions (n=124) that are 100% conserved in active elements

| <b>Number of Alu elements with exactly n mutation</b> |      |      |      |
|-------------------------------------------------------|------|------|------|
| <b>Number of mutations</b>                            | 0    | 1    | 2    |
| <b>All</b>                                            | 3437 | 3818 | 5176 |
| <b>AluJ</b>                                           | 0    | 0    | 0    |
| <b>AluS</b>                                           | 7    | 110  | 606  |
| <b>AluY</b>                                           | 3430 | 3708 | 4570 |

  

| <b>Number of Alu Elements with up to n mutations</b> |      |      |       |
|------------------------------------------------------|------|------|-------|
| <b>Number of mutations</b>                           | 0    | 1    | 2     |
| <b>All</b>                                           | 3437 | 7255 | 12431 |
| <b>AluJ</b>                                          | 0    | 0    | 0     |
| <b>AluS</b>                                          | 7    | 117  | 723   |
| <b>AluY</b>                                          | 3430 | 7138 | 11708 |

  

| <b>Proportion of each Alu family having up to n mutations (in %)</b> |      |      |      |
|----------------------------------------------------------------------|------|------|------|
| <b>Number of mutations</b>                                           | 0    | 1    | 2    |
| <b>All</b>                                                           | 100  | 100  | 100  |
| <b>AluJ</b>                                                          | 0    | 0    | 0    |
| <b>AluS</b>                                                          | 0.2  | 1.6  | 5.8  |
| <b>AluY</b>                                                          | 99.8 | 98.4 | 94.2 |
